# Supplementary material for: The effect of ethanol concentration on the morphological and molecular preservation of insects for biodiversity studies
Source: PubMed Central journal article supplement (PMC7883690; doi:10.7717/peerj.10799), 2021-02-12
Supplement: peerj-09-10799-s001.pdf [file peerj-09-10799-s001.pdf]

# The effect of ethanol concentration on the morphological and molecular preservation of insects for biodiversity studies

Daniel Marquina, Mateusz Buczek, Fredrik Ronquist & Piotr Łukasik

## Supplementary Material

### Table Of Contents:

|                                   |   |
|-----------------------------------|---|
| Quantification - spike-in plasmid | 1 |
| Amplicon data analysis pipeline   | 2 |
| Table S1.                         | 3 |
| Table S2.                         | 4 |
| Table S3.                         | 5 |
| Table S4.                         | 5 |

---

### Quantification - spike-in plasmid

The insert sequence was developed based on *Calliophora vomitoria* COI sequence, and synthesized and inserted into vector backbone pEX-A128 by Eurofins Genomics. The plasmid was cloned into JO-FI competent cells derived from the *E. coli* DH5 $\alpha$  strain (A&A Biotechnology) using CloneJET PCR Cloning kit (Thermo Fisher Scientific). A single successfully transformed colony was transferred into LB medium (A&A Biotechnology) mixed with Ampicilin Sodium (A&A Biotechnology) at the final concentration 100 ug/ml and grown overnight at 37°C. Plasmids were extracted from an overnight culture using Plasmid Miniprep DNA Purification Kit (EurX), linearized using single-cutting enzyme AatII (New England Biosciences), quantified using Qubit dsDNA HS Assay Kit (Thermo Fisher Scientific), and diluted with TE to the working concentration.

The insert sequence, with BF3/BR2 primer sites underlined:

>COI\_CallioSynth

```
GGAGCCCCAGATATAGCATTCCCTCGAATAAAATTATTACATATATTTGCTATACTTAGTTCACTATCGTAA
GCATAAATATACAGAATATGAAATATTGGAGCTGGAAGTGGATGAACTGTTTATCCACCTTTATCGCCATGC
ATAACTCTTCACTGATCTAAGGACGATATGGTTAGTATCTGTATACTTAGACGATGTATAAAGTCGAATCAA
TGC GTTAGAAACATTTATAGAATAGATAATTAGACATATTGTACGCCTAATAAGAACAAGATAAGACGCTA
AATCCAATCAATTCTTCAAGTAGTATACTATACTGTACTATATTCTTTACCAGTATTAGCAGGAGCTATTACT
ATATTTGATTACCTCTAGTTATAATAAATGTAATGATAAACGAAGTAATAACAAGTAGAACTATTCATATAA
CATGATTTATTTGATTTTTTGGTCATCCTGAAGTTTAT
```

### Amplicon data analysis pipeline

The amplicon data were analyzed using Mothur v.1.44.2, using a custom pipeline. Commands are provided below.

```
# Merging reads into contigs
make.contigs(file=DNA.txt)

# variable-length insert primer trimming, screening contigs based on
# quality and length
trim.seqs(fasta=DNA.trim.contigs.fasta,
oligos=/mnt/matrix/symbio/db/references/primers_to_trim_VarLenIns.oligos,
processors=32, minlength=400, maxlength=430, maxambig=0, maxhomop=10,
pdiffs=2)
# primers_to_trim_VarLenIns.oligos ---
# oligos used for library prep:
# COIBF3_P5  ACACTCTTTCCTACACGACGCTCTTCCGATCT---
#           {insert}CCHGAYATRGCHTTYCCHCG
# COIBR2_P7  GTGACTGGAGTTCAGACGTGTGCTCTTCCGATCT---
#           {insert}CDGGRTGNCCRAARAAYCA

forward CCHGAYATRGCHTTYCCHCG
forward ACCHGAYATRGCHTTYCCHCG
forward GACCHGAYATRGCHTTYCCHCG
forward TGACCHGAYATRGCHTTYCCHCG
reverse CDGGRTGNCCRAARAAYCA
reverse TCDGGRTGNCCRAARAAYCA
reverse ATCDGGRTGNCCRAARAAYCA
reverse GATCDGGRTGNCCRAARAAYCA

# selecting only the sequences that survived the screen from the group
# file
list.seqs(fasta=DNA.trim.contigs.trim.fasta)
get.seqs(accnos=DNA.trim.contigs.trim.accnos, group=DNA.contigs.groups)

# read dereplication
unique.seqs(fasta=DNA.trim.contigs.trim.fasta)
count.seqs(name=DNA.trim.contigs.trim.names,
group=DNA.contigs.pick.groups, compress=f)

# discarding singletons
split.abund(fasta=DNA.trim.contigs.trim.unique.fasta,
count=DNA.trim.contigs.trim.count_table, cutoff=1)

# aligning reads against a custom reference - alignment of previously
# obtained COI sequences of the experimental species, the spike-in
# standard, and alphaproteobacterial symbionts
align.seqs(fasta=DNA.trim.contigs.trim.unique.abund.fasta,
reference=/mnt/matrix/symbio/db/references/COI_ref_seqs_fragility.fasta,
processors=40)
```

```

# discarding unaligned or poorly aligned sequences, filtering the
alignment
screen.seqs(fasta=DNA.trim.contigs.trim.unique.abund.align,
count=DNA.trim.contigs.trim.abund.count_table,          minlength=410,
maxlength=425, start=2, end=430)
filter.seqs(fasta=DNA.trim.contigs.trim.unique.abund.good.align,vertical=T
, trump=.)

# clustering, using the Vsearch agc algorithm
cluster(fasta=DNA_final.fasta, count=DNA_final.count_table, method=agc,
cutoff=0.03)

# based on clustering results, binning sequences, generating OTU table,
and identifying representative sequences for OTUs
bin.seqs(list=DNA_final.agc.list, fasta=DNA_final.fasta, label=0.03)
make.shared(list=DNA_final.agc.list, count=DNA_final.count_table,
label=0.03)
get.oturep(list=DNA_final.agc.list, fasta=DNA_final.agc.0.03.fasta,
count=DNA_final.count_table, method=abundance, cutoff=0.03)

```

**Table S1.**

Species included in the communities, number of individuals used, expected brittleness, and origin.

| <b>Species</b>                   | <b>No.<br/>individuals</b> | <b>Brittleness</b> | <b>Origin</b>                               |
|----------------------------------|----------------------------|--------------------|---------------------------------------------|
| <i>Macrolophus pygmaeus</i>      | 10                         | Weak               | Commercial purchase: Lindesro AB (Sweden)   |
| <i>Aphidoletes aphidimyza</i>    | 10                         | Very weak          | Commercial purchase: Lindesro AB (Sweden)   |
| <i>Drosophila hydei</i>          | 10                         | Tough              | Commercial purchase: Fibe AB (Sweden)       |
| <i>Dacnusa sibirica</i>          | 10                         | Tough              | Commercial purchase: Lindesro AB (Sweden)   |
| <i>Calliphora vomitoria</i>      | 2                          | Intermediate       | Commercial purchase: Reptilgrottan (Sweden) |
| <i>Formica rufa</i>              | 2                          | Very tough         | Collected from NRM surroundings             |
| <i>Dermestes haemorrhoidalis</i> | 2                          | Very tough         | Donated from NRM vertebrate collection      |

**Table S2.**

Pairwise comparisons for treatments with significant differences in Experiment 1. Treatment 1 is different from Treatment 2, being the mean number of appendages lost higher/lower in Treatment 2. Number = ethanol concentration, G = Gentle shaking, V= Violent shaking.

| <b>Species</b>                | <b>Treatment 1</b> | <b>Treatment 2</b>      | <b>Lower / Higher</b> |
|-------------------------------|--------------------|-------------------------|-----------------------|
| <i>Macrolophus pygmaeus</i>   | 30G                | 80G, 90G, 95G, 97G      | Higher                |
|                               | 30G                | 70V, 90V, 95V, 97V, 99V | Higher                |
|                               | 50G                | 95V                     | Higher                |
|                               | 95G                | 30V                     | Lower                 |
|                               | 30V                | 95V                     | Higher                |
|                               | 50V                | 95V                     | Higher                |
|                               | 80V                | 95V                     | Higher                |
| <i>Aphidoletes aphidimyza</i> | 30G                | 90G, 95G, 97G, 99G      | Higher                |
|                               | 30G                | 90V, 95V, 97V, 99V      | Higher                |
|                               | 50G                | 90G, 95G, 97G, 99G      | Higher                |
|                               | 50G                | 90V, 95V, 97V, 99V      | Higher                |
|                               | 50G                | 30V                     | Higher                |
|                               | 70G                | 90G, 95G, 97G, 99G      | Higher                |
|                               | 70G                | 30V                     | Higher                |
|                               | 70G                | 90V, 95V, 97V, 99V      | Higher                |
|                               | 80G                | 90G, 95G, 97G, 99G      | Higher                |
|                               | 80G                | 95V, 95V, 99V           | Higher                |
|                               | 90G                | 30V, 50V, 70V, 80V      | Lower                 |
|                               | 90G                | 99V                     | Higher                |
|                               | 95G                | 30V, 50V, 70V, 80V      | Lower                 |
|                               | 97G                | 30V, 50V, 70V, 80V, 90V | Lower                 |
|                               | 99G                | 30V, 50V, 70V, 80V, 90V | Lower                 |
|                               | 30V                | 95V, 97V, 99V           | Higher                |
|                               | 50V                | 95V, 97V, 99V           | Higher                |
|                               | 70V                | 90V, 95V, 97V, 99V      | Higher                |
| 80V                           | 95V, 97V, 99V      | Higher                  |                       |
| 90V                           | 97V, 99V           | Higher                  |                       |
| <i>Drosophila hydei</i>       | 50G                | 90V                     | Lower                 |
|                               | 97G                | 90V                     | Lower                 |
|                               | 30V                | 90V                     | Lower                 |
|                               | 50V                | 90V                     | Lower                 |
|                               | 70V                | 90V                     | Lower                 |
| <i>Calliphora vomitoria</i>   | 70G                | 95G, 99G                | Higher                |
|                               | 70G                | 95V, 99V                | Higher                |
|                               | 70V                | 95G, 99G                | Higher                |
|                               | 70V                | 95V, 99V                | Higher                |

**Table S3.**

Pairwise comparisons for treatments with significant differences in Experiment 2. Treatment 1 is different from Treatment 2, being the mean number of appendages lost higher/lower in Treatment 2. Number = ethanol concentration, W = Walking transport, R= Running transport, PN = PostNord transport.

| <b>Species</b>                | <b>Treatment 1</b> | <b>Treatment 2</b> | <b>Lower / Higher</b> |
|-------------------------------|--------------------|--------------------|-----------------------|
| <i>Macrolophus pygameus</i>   | 70W                | 70R, 95R           | Higher                |
|                               | 70W                | 70PN, 95PN         | Higher                |
|                               | 95W                | 70R, 95R           | Higher                |
|                               | 95W                | 70R, 95R           | Higher                |
|                               | 70R                | 95R                | Higher                |
|                               | 95R                | 70PN               | Lower                 |
|                               | 70PN               | 95PN               | Higher                |
| <i>Aphidoletes aphidimyza</i> | 70W                | 95R                | Higher                |
|                               | 70W                | 95PN               | Higher                |
|                               | 95W                | 95R                | Higher                |
|                               | 95W                | 95PN               | Higher                |
|                               | 70R                | 95R                | Higher                |
|                               | 70R                | 95PN               | Higher                |
|                               | 95R                | 70PN               | Lower                 |
|                               | 95R                | 95PN               | Lower                 |
|                               | 70PN               | 95PN               | Higher                |

**Table S4.**

Pairwise comparisons for treatments with significant differences in Experiment 3. Treatment 1 is different from Treatment 2, being the mean number of appendages lost higher/lower in Treatment 2. Number = ethanol concentration, C = Control, D= Drying pre-treatment, F = Freezing pre-treatment.

| <b>Species</b>                | <b>Treatment 1</b> | <b>Treatment 2</b> | <b>Lower / Higher</b> |
|-------------------------------|--------------------|--------------------|-----------------------|
| <i>Macrolophus pygameus</i>   | 70D                | 70C, 95C           | Higher                |
|                               | 70D                | 95D                | Higher                |
|                               | 95D                | 70F, 95F           | Higher                |
| <i>Aphidoletes aphidimyza</i> | 70C                | 95C                | Higher                |
|                               | 70C                | 95D                | Higher                |
|                               | 70C                | 95F                | Higher                |
|                               | 70D                | 95C                | Higher                |
|                               | 70D                | 95D                | Higher                |
|                               | 70D                | 95F                | Higher                |
|                               | 70F                | 95C                | Higher                |
|                               | 70F                | 95D                | Higher                |
|                               | 70F                | 95F                | Higher                |
| <i>Drosophila hydei</i>       | 95D                | 70F                | Lower                 |
| <i>Calliphora vomitoria</i>   | 70F                | 95F                | Higher                |
